# Supplementary material
Source: PubMed Central journal article supplement (PMC7842871)
Supplement: AJSLP-29-673-s001.pdf [file AJSLP-29-673-s001.pdf]

| Question                                                                                                                  |                  |                      |                                                                                                |                        |
|---------------------------------------------------------------------------------------------------------------------------|------------------|----------------------|------------------------------------------------------------------------------------------------|------------------------|
| How comfortable do you feel using technology?                                                                             | Very comfortable | Somewhat comfortable | Not very comfortable                                                                           | Not comfortable at all |
| Comment on your current tech use:                                                                                         |                  |                      |                                                                                                |                        |
| What is your WiFi speed?                                                                                                  | Download         | Upload               | Please visit: <a href="http://www.speedtest.net/">http://www.speedtest.net/</a> and click “Go” |                        |
| Do you have someone at home who can help you with the computer?                                                           | Yes              | No                   | Comments                                                                                       |                        |
| Will you/have you participated in any groups (conversation, therapy) or received individual therapy in the past 6 months? | Yes              | No                   | Comments                                                                                       |                        |

| Question                                                         | Computerized Assessment |                     |          |                  |                |
|------------------------------------------------------------------|-------------------------|---------------------|----------|------------------|----------------|
| Overall Satisfaction                                             | Not Satisfied           | Less than Satisfied | Neutral  | Mostly Satisfied | Very Satisfied |
| Audio Quality                                                    | Inadequate              | Poor                | Adequate | Good             | Excellent      |
| Visual Quality                                                   | Inadequate              | Poor                | Adequate | Good             | Excellent      |
| Level of comfort with experience                                 | Disliked                | Uneasy              | Neutral  | Comfortable      | Very Happy     |
| Would you participate again?                                     | Yes                     | No                  | Comments |                  |                |
| Overall                                                          |                         |                     |          |                  |                |
| Are you equally satisfied with in person and online assessments? | Yes                     | No                  | Comments |                  |                |
