# Supplementary material
Source: PubMed Central journal article supplement (PMC7842871)
Supplement: AJSLP-29-673-s002.pdf [file AJSLP-29-673-s002.pdf]

## Supplemental Material S2. Caregiver testing guidelines.<sup>a</sup>

1. Thank you for being present and supporting your (*insert relationship here*) during testing.
2. Please follow these basic rules:
  - a. Do not provide any clues or help. Do not:
    - i. Provide feedback to the participant on his/her performance
    - ii. Repeat instructions given by the clinician
    - iii. Make facial expressions to hint correct/incorrect response
    - iv. Alter the participant's responses (e.g., written responses)
    - v. Allow the participant to use notes, references, or other aids
  - b. Ensure a private and quiet testing area (e.g., turn off TV, not near laundry room, etc.)
3. We need your help with:
  - a. Adjusting the video camera and audio.
  - b. Placing specific items in front of the participant.
    - i. Have at hand: book, comb, pen, any materials we provided for you, and blank sheets of paper ready for testing
  - c. If necessary, move the mouse for the participant. If the participant is able to point to an object on the computer but cannot move the mouse to that location, mirror movement with the mouse (move mouse exactly where the participant is pointing to). Do not correct any errors made by the participant.
  - d. At the end of the test, take pictures of written work and email to: (*insert clinician's email*).

<sup>a</sup>These are general principles discussed verbally with the caregiver. The clinician modified the level of detail and wording depending on the situation.
